# Supplementary material
Source: ML conference proceedings conference paper supplement (https://openreview.net/forum?id=sMIMAXqiqj3)
Supplement: supplementary_material [file attachment]

## A Omitted Derivations of Formulas

We have omitted a number of complicated formulas in the main text to provide clear intuition and concise proof sketch. We will list all mentioned formulas here for readers' reference.

$$\begin{aligned}
\sigma_d(A_{t+1}) &\geq \sigma_d(A_t + \eta(\Sigma - A_t A_t^\top)A_t) - \eta(3\sqrt{2\sigma_1}\|B_t\|_{op}^2 + \sqrt{2\sigma_1}(\|K_t\|_{op}^2 + \|J_t\|_{op}^2)) \\
&\geq \sqrt{\sigma_d(\bar{S}_{t+1})} - \eta(3\sqrt{2\sigma_1}e_b^2\varepsilon^2 d^2 + \sqrt{2\sigma_1}c^2\varepsilon^2(m+n)) \\
&\geq \sqrt{(1 + \eta(\sigma_d - \sigma_d(A_t)^2))^2 \sigma_d(A_t)^2 - 22\sigma_1^3 \eta^2} \\
&\quad - 1.5\sqrt{2\sigma_1}\eta(e_b^2 + c^2)\varepsilon^2(m+n)d.
\end{aligned} \tag{20}$$

$$\begin{aligned}
\|C_t\|_{op} &\leq 2\sqrt{2\sigma_1}e_b^2 d^2 \varepsilon^2 + \sqrt{2\sigma_1}c^2 \varepsilon^2 (\max\{d, m'\} + \max\{d, n'\}) \\
&\leq \sqrt{2\sigma_1}(e_b^2 + c^2)(m+n)d\varepsilon^2; \\
\|D_t\|_{op} &\leq 4\sigma_1 e_b d \varepsilon + \sqrt{2\sigma_1}c^2 \varepsilon^2 (\max\{d, m'\} + \max\{d, n'\}) \\
&\leq 8\sigma_1 e_b d \varepsilon.
\end{aligned} \tag{21}$$

$$\begin{aligned}
\|B_{t+1}\|_F^2 - \|B_t\|_F^2 &= -2\eta \left\langle B_t B_t^\top, \Sigma - A_t A_t^\top + B_t B_t^\top + \frac{K_t^\top K_t + J_t^\top J_t}{2} \right\rangle \\
&\quad - \eta \|A_t B_t^\top - B_t A_t^\top\|_F^2 + \eta \langle B_t^\top A_t, K_t^\top K_t - J_t^\top J_t \rangle \\
&\quad + \eta^2 \|(\Sigma - A_t A_t^\top + B_t B_t^\top)B_t + (A_t B_t^\top - B_t A_t^\top)A_t \\
&\quad - A_t \frac{K_t^\top K_t - J_t^\top J_t}{2} - B_t \frac{K_t^\top K_t + J_t^\top J_t}{2}\|_F^2 \\
&\leq -2\eta \lambda_d(P_t) \|B_t\|_F^2 + \eta \|B_t^\top A_t\|_F \|K_t^\top K_t - J_t^\top J_t\|_F \\
&\quad + \eta^2 \|(\Sigma - A_t A_t^\top + B_t B_t^\top)B_t + (A_t B_t^\top - B_t A_t^\top)A_t \\
&\quad - A_t \frac{K_t^\top K_t - J_t^\top J_t}{2} - B_t \frac{K_t^\top K_t + J_t^\top J_t}{2}\|_F^2 \\
&\leq O(\eta e_b^2 \varepsilon^2 (m+n)d\kappa) \|B_t\|_F^2 + O(\eta \sqrt{\sigma_1} e_b (m+n)d^2 \varepsilon^3) \\
&\quad + O(\eta^2 \sigma_1^2 e_b^2 d^2 \varepsilon^2). \\
&= O(\eta e_b^2 \varepsilon^2 (m+n)d\kappa) \|B_t\|_F^2 + O(\eta \sqrt{\sigma_1} e_b (m+n)d^2 \varepsilon^3).
\end{aligned} \tag{22}$$

$$\begin{aligned}
\Sigma - U_{t+1+T_0} V_{t+1+T_0}^\top &= (I - \eta U_{t+T_0} U_{t+T_0}^\top)(\Sigma - U_{t+T_0} V_{t+T_0}^\top)(I - \eta V_{t+T_0} V_{t+T_0}^\top) \\
&\quad - \eta^2 U_{t+T_0} U_{t+T_0}^\top (\Sigma - U_{t+T_0} V_{t+T_0}^\top) V_{t+T_0} V_{t+T_0}^\top \\
&\quad - \eta^2 (\Sigma - U_{t+T_0} V_{t+T_0}^\top) V_{t+T_0} U_{t+T_0}^\top (\Sigma - U_{t+T_0} V_{t+T_0}^\top) \\
&\quad + \eta(U_{t+T_0} + \eta(\Sigma - U_{t+T_0} V_{t+T_0}^\top) V_{t+T_0}) J_{t+T_0}^\top J_{t+T_0} V_{t+T_0}^\top \\
&\quad + \eta U_{t+T_0} K_{t+T_0}^\top K_{t+T_0} (V_{t+T_0} + \eta(\Sigma - U_{t+T_0} V_{t+T_0}^\top)^\top U_{t+T_0})^\top \\
&\quad - \eta^2 U_{t+T_0} K_{t+T_0}^\top K_{t+T_0} J_{t+T_0}^\top J_{t+T_0} V_{t+T_0}^\top.
\end{aligned} \tag{23}$$

## B Dynamics in the Symmetric and Full-Rank Case

We consider the case where  $U = V = A$  and  $\Sigma$  is symmetric and full-rank, and we use gradient flow. We can derive the dynamics of  $S = AA^\top$  as  $\dot{S} := (\Sigma - S)S + S(\Sigma - S)$ , which is a quadratic ordinary differential equation and it is hard to solve directly.

However, if we define  $\bar{X} := S^{-1}$ , we have  $S\bar{X} \equiv I$ . Taking the derivative implies  $\dot{S}\bar{X} + S\dot{\bar{X}} = 0$ . Hence,  $\dot{\bar{X}} = -S^{-1}\dot{S}S^{-1}$ . Substitute  $\dot{S} = (\Sigma - S)S + S(\Sigma - S)$  in it, we have

$$\dot{\bar{X}} = -S^{-1}((\Sigma - S)S + S(\Sigma - S))S^{-1} = -\bar{X}\Sigma - \Sigma\bar{X} + 2I,$$

which is a *linear* ordinary differential equation.

For simplicity, define  $X := \bar{X} - \Sigma^{-1}$ . Then

$$\dot{X} = -X\Sigma - \Sigma X. \quad (24)$$

Solving this equation and we have

$$X(t) = e^{-t\Sigma}X_0e^{-t\Sigma}. \quad (25)$$

Finally, we could conclude that

$$S(t) = (e^{-t\Sigma}(S_0^{-1} - \Sigma^{-1})e^{-t\Sigma} + \Sigma^{-1})^{-1}. \quad (26)$$

Similarly, because  $P$ 's dynamic is  $\dot{P} = -(\Sigma - P)P - P(\Sigma - P)$ , we have

$$P(t) = (e^{t\Sigma}(P_0^{-1} - \Sigma^{-1})e^{t\Sigma} + \Sigma^{-1})^{-1}, \quad (27)$$

where  $P_0 := \Sigma - S_0$ .

And it is interesting to verify that  $S(t) + P(t) \equiv \Sigma$  by using the following lemma.

**Lemma B.1.** *Suppose  $S, P, E \in \mathbb{R}^{d \times d}$  are three positive definite matrices.  $\Sigma = S + P$ . Suppose  $E$  commutes with  $\Sigma$ . Then*

$$(E(S^{-1} - \Sigma^{-1})E + \Sigma^{-1})^{-1} + (E^{-1}(P^{-1} - \Sigma^{-1})E^{-1} + \Sigma^{-1})^{-1} = \Sigma.$$

## C Proof of Lemmas

*Proof of lemma B.1.* Since  $\Sigma$  is invertible, we only need to verify the equation after right multiplying both side by  $\Sigma^{-1}$ . We have

$$\begin{aligned} & (E(S^{-1} - \Sigma^{-1})E + \Sigma^{-1})^{-1} \Sigma^{-1} + (E^{-1}(P^{-1} - \Sigma^{-1})E^{-1} + \Sigma^{-1})^{-1} \Sigma^{-1} \\ &= (E(\Sigma S^{-1} - I)E + I)^{-1} + (E^{-1}(\Sigma P^{-1} - I)E^{-1} + I)^{-1} \end{aligned} \quad (28)$$

$$= (E(PS^{-1})E + I)^{-1} + (E^{-1}(SP^{-1})E^{-1} + I)^{-1} \quad (29)$$

$$= (Z + I)^{-1} + (Z^{-1} + I)^{-1} \quad (\text{we denote } E(PS^{-1})E \text{ by } Z \text{ here}) \quad (30)$$

$$= (Z + I)^{-1} + Z(Z + I)^{-1}$$

$$= I$$

$$= \Sigma \Sigma^{-1},$$

where (28) is because  $\Sigma$  commutes with  $E$ , (29) is because  $\Sigma = S + P$  and finally (30) is because  $(E(PS^{-1})E)^{-1} = E^{-1}(SP^{-1})E^{-1}$ .  $\square$

**General analysis for lemma 3.2 and 3.3** Suppose  $\bar{S}, \tilde{S}$  and  $\Sigma$  are three symmetric matrices. Define  $D = \bar{S} - \tilde{S}$ . Then we have equation

$$\begin{aligned} & (I + \eta(\Sigma - \bar{S}))\bar{S}(I + \eta(\Sigma - \bar{S})) - (I + \eta(\Sigma - \tilde{S}))\tilde{S}(I + \eta(\Sigma - \tilde{S})) \\ &= \bar{S} - \tilde{S} + \eta \left( (\Sigma - \bar{S})\bar{S} + \bar{S}(\Sigma - \bar{S}) - (\Sigma - \tilde{S})\tilde{S} + \tilde{S}(\Sigma - \tilde{S}) \right) \\ & \quad + \eta^2 \left( (\Sigma - \bar{S})\bar{S}(\Sigma - \bar{S}) - (\Sigma - \tilde{S})\tilde{S}(\Sigma - \tilde{S}) \right) \\ &= D + \eta((\Sigma - \bar{S} - \tilde{S})D + D(\Sigma - \bar{S} - \tilde{S})) \\ & \quad + \eta^2 \left( (\Sigma - \bar{S})\bar{S}(\Sigma - \bar{S}) - (\Sigma - \tilde{S})\tilde{S}(\Sigma - \tilde{S}) \right) \\ &= \left( I + \eta(\Sigma - \bar{S} - \tilde{S}) \right) D \left( I + \eta(\Sigma - \bar{S} - \tilde{S}) \right) \\ & \quad + \eta^2 \left( (\Sigma - \bar{S} - \tilde{S})D(\Sigma - \bar{S} - \tilde{S}) + (\Sigma - \bar{S})\bar{S}(\Sigma - \bar{S}) - (\Sigma - \tilde{S})\tilde{S}(\Sigma - \tilde{S}) \right). \end{aligned} \quad (31)$$

*Proof of lemma 3.2.* First of all, we can expand the expression of  $S'$  and split it in the following terms.

$$\begin{aligned}\sigma_d(S') &\geq \lambda_d(\beta S - 2\eta S^2 + \eta^2 S^3) + \sigma_d\left((1-\beta)S + \eta\Sigma S + \eta S\Sigma + \frac{\eta^2}{1-\beta}\Sigma S\Sigma\right) \\ &\quad + \eta^2 \lambda_d\left(-\frac{\beta}{1-\beta}\Sigma S\Sigma - \Sigma S S - S S\Sigma\right).\end{aligned}$$

For the first term  $\beta S - 2\eta S^2 + \eta^2 S^3$ , its eigenvalues are  $\beta s_i - 2\eta s_i^2 + \eta^2 s_i^3$  since  $S$  is commutable with itself, where  $s_i$  is the  $i^{\text{th}}$  largest singular value of  $S$ . By the assumptions  $s_i \leq 2\sigma_1$  and  $\eta \leq \frac{\beta}{8\sigma_1}$ , we see the smallest eigenvalue of  $\beta S - 2\eta S^2 + \eta^2 S^3$  is exactly  $\beta s - 2\eta s^2 + \eta^2 s^3$ .

For the second term, it can be rewritten as

$$(1-\beta)S + \eta\Sigma S + \eta S\Sigma + \frac{\eta^2}{1-\beta}\Sigma S\Sigma \equiv \left(\sqrt{1-\beta}I + \frac{\eta}{\sqrt{1-\beta}}\Sigma\right) S \left(\sqrt{1-\beta}I + \frac{\eta}{\sqrt{1-\beta}}\Sigma\right).$$

Hence, the minimal singular value can be bounded by  $\left(\sqrt{1-\beta} + \frac{\eta\sigma_d}{\sqrt{1-\beta}}\right)^2 s$ .

Finally, the last term can be lower bounded by  $-\eta^2\sigma_1\left(-\frac{\beta}{1-\beta}\Sigma S\Sigma - \Sigma S S - S S\Sigma\right) \geq -\frac{8+6\beta}{1-\beta}\eta^2\sigma_1^3$ . Summing up all three terms and we get

$$\begin{aligned}s' &\geq (\beta s - 2\eta s^2 + \eta^2 s^3) + \left(\sqrt{1-\beta} + \frac{\eta\sigma_d}{\sqrt{1-\beta}}\right)^2 s - \frac{8+6\beta}{1-\beta}\eta^2\sigma_1^3 \\ &= (1 + \eta(\sigma_d - s))^2 s + \frac{\beta\sigma_d^2}{1-\beta}\eta^2 s + 2\sigma_d\eta^2 s^2 - \frac{8+6\beta}{1-\beta}\sigma_1^3\eta^2 \\ &\geq (1 + \eta(\sigma_d - s))^2 s - \frac{8+6\beta}{1-\beta}\sigma_1^3\eta^2.\end{aligned}$$

□

**Remark:** If we choose  $\bar{S} = S$  and  $\tilde{S} = \sigma_d(S)I$  in equation (31), we know  $D = \bar{S} - \tilde{S} \succeq 0$ . Hence  $\sigma_d(S') \geq (1 + \eta(\sigma_d - s))^2 s - O(\sigma_1^3\eta^2)$ .

*Proof of lemma 3.3.* If  $p \geq 0$ , it suggests that  $P$  is positive semi-definite, and  $P'$  is positive semi-definite, too. Hence  $p' \geq 0$  if  $p \geq 0$ .

If  $p \leq 0$ , we can expand the expression of  $P'$  and split it in the following terms.

$$\begin{aligned}\lambda_d(P') &\geq \lambda_d(\beta P + 2\eta P^2 + \eta^2 P^3) + \lambda_d\left((1-\beta)P - \eta\Sigma P - \eta P\Sigma + \frac{\eta^2}{1-\beta}\Sigma P\Sigma\right) \\ &\quad + \eta^2 \lambda_d\left(-\frac{\beta}{1-\beta}\Sigma P\Sigma - \Sigma P P - P P\Sigma\right).\end{aligned}$$

For the first term  $\beta P + 2\eta P^2 + \eta^2 P^3$ , its eigenvalues are  $\beta p_i + 2\eta p_i^2 + \eta^2 p_i^3$  since  $P$  is commutable with itself, where  $p_i$  is the  $i^{\text{th}}$  largest eigenvalue of  $P$ . By the assumptions  $|p_i| \leq 2\sigma_1$  and  $\eta \leq \frac{\beta}{8\sigma_1}$ , we see the smallest eigenvalue of  $\beta P + 2\eta P^2 + \eta^2 P^3$  is exactly  $\beta p + 2\eta p^2 + \eta^2 p^3$ .

For the second term, it can be rewritten as

$$(1-\beta)P - \eta\Sigma P - \eta P\Sigma + \frac{\eta^2}{1-\beta}\Sigma P\Sigma \equiv \left(\sqrt{1-\beta}I - \frac{\eta}{\sqrt{1-\beta}}\Sigma\right) P \left(\sqrt{1-\beta}I - \frac{\eta}{\sqrt{1-\beta}}\Sigma\right).$$

Hence, the minimal eigenvalue can be bounded by  $\left(\sqrt{1-\beta} - \frac{\eta\sigma_d}{\sqrt{1-\beta}}\right)^2 p$  if  $p \leq 0$ .

Finally, the last term can be lower bounded by  $-\eta^2\sigma_1\left(-\frac{\beta}{1-\beta}\Sigma P\Sigma - \Sigma P P - P P\Sigma\right) \geq -\frac{8+6\beta}{1-\beta}\eta^2\sigma_1^3$ . Summing up all three terms and we get that when  $p \leq 0$ ,

$$\begin{aligned}
p' &\geq (\beta p + 2\eta p^2 + \eta^2 p^3) + \left(\sqrt{1-\beta} - \frac{\eta\sigma_d}{\sqrt{1-\beta}}\right)^2 p - \frac{8+6\beta}{1-\beta}\eta^2\sigma_1^3 \\
&= (1 - \eta(\sigma_d - p))^2 p + \frac{\beta\sigma_d^2}{1-\beta}\eta^2 p + 2\sigma_d\eta^2 p^2 - \frac{8+6\beta}{1-\beta}\sigma_1^3\eta^2 \\
&\geq (1 - \eta(\sigma_d - p))^2 p - \frac{8+6\beta}{1-\beta}\sigma_1^3\eta^2 \\
&\geq (1 - \eta\sigma_d)^2 p - \frac{8+6\beta}{1-\beta}\sigma_1^3\eta^2.
\end{aligned}$$

□

**Remark:** Similarly, if we choose  $\bar{S} = P$  and  $\tilde{S} = \lambda_d(P)I$  in equation (31), we have  $D = P - \lambda_d(P)I \succeq 0$ . Hence we have  $\lambda_d(P') \geq \min\{0, (1 - \eta\sigma_d)^2 p + O(\sigma_1^3\eta^2)\}$ .

## D Solving the Iteration Formula of $a$

In this section we analyze the iteration formula (15).

We first consider the case when  $a_t \leq \sqrt{\frac{\sigma_d}{2}}$ . Notice that  $a_t \geq \frac{\varepsilon}{c\sqrt{d}}$ , we have

$$\sqrt{(1 + \eta(\sigma_d - \sigma_d(A_t)^2))^2 \sigma_d(A_t)^2 - 22\sigma_1^3\eta^2} \geq (1 + \eta(\sigma_d - \sigma_d(A_t)^2))\sigma_d(A_t) - 22\frac{c\sqrt{d}}{\varepsilon}\sigma_1^3\eta^2,$$

where we choose  $\eta$  so small that  $22\sigma_1^3\eta^2 \leq \frac{\varepsilon^2}{c^2d}$ .

By taking  $\varepsilon = O\left(\frac{\sigma_d}{\sqrt{d^3\sigma_1 e_b^2(m+n)}}\right)$  and  $\eta = O\left(\frac{\sigma_d \varepsilon^2}{d\sigma_1^3}\right)$ , we have  $\frac{1}{2}\eta(\sigma_d - a_t^2)a_t \geq \frac{1}{2}\eta\frac{\sigma_d}{2}\frac{\varepsilon}{c\sqrt{d}} \geq 22\frac{c\sqrt{d}}{\varepsilon}\sigma_1^3\eta^2 + 1.5\sqrt{2}\sigma_1\eta(e_b^2 + c^2)\varepsilon^2(m+n)d$ , hence,

$$a_{t+1} \geq \left(1 + \frac{\eta}{2}(\sigma_d - a_t^2)\right) a_t, \quad (32)$$

and

$$s_{t+1} \geq \left(1 + \frac{\eta}{2}(\sigma_d - s_t)\right)^2 s_t \geq (1 + \eta(\sigma_d - s_t)) s_t. \quad (33)$$

Subtracting  $\sigma_d$  by (33), we have

$$\sigma_d - s_{t+1} \leq (1 - \eta s_t)(\sigma_d - s_t). \quad (34)$$

Dividing (33) by (34) we have

$$\frac{s_{t+1}}{\sigma_d - s_{t+1}} \geq \frac{1 + \eta(\sigma_d - s_t)}{1 - \eta s_t} \frac{s_t}{\sigma_d - s_t} \geq (1 + \eta\sigma_d) \frac{s_t}{\sigma_d - s_t}.$$

Hence,  $\frac{s_T}{\sigma_d - s_T} \geq (1 + \eta\sigma_d)^T \frac{s_0}{\sigma_d}$ . So, it takes at most  $T_1 := O\left(\frac{1}{\eta\sigma_d} \ln \frac{d\sigma_d}{\varepsilon^2}\right)$  iterations to bring  $a_t$  to at least  $\sqrt{\frac{\sigma_d}{2}}$ .

## E Solving the Iteration Formula on $B$

The iteration formula can be summarized as

$$\|B_{t+1}\|_F^2 \leq (1+p)\|B_t\|_F^2 + q,$$

where  $p = O(\eta e_b^2 \varepsilon^2 (m+n) d \kappa)$  and  $q = O(\eta \sqrt{\sigma_1} e_b (m+n) d^2 \varepsilon^3)$ . Moreover, we have

$$\|B_T\|_F^2 \leq (1+p)^T \|B_0\|_F^2 + ((1+p)^T - 1) \frac{q}{p}.$$

Suppose  $T \leq T_0 = O\left(\frac{1}{\eta \sigma_d} \ln \frac{d \sigma_d}{\varepsilon^2}\right)$ . By choosing  $\varepsilon = \tilde{O}\left(\frac{\sqrt{\sigma_d}}{e_b \sqrt{(m+n) d \kappa}}\right)^{12}$ , we have  $pT \leq pT_0 \leq 1$ . Then  $(1+p)^T = 1 + \binom{T}{1}p + \binom{T}{2}p^2 + \dots + \binom{T}{T}p^T \leq 1 + Tp \left(1 + \frac{1}{2!} + \dots + \frac{1}{T!}\right) \leq 1 + (e-1)Tp \leq 1 + 2pT$ . Hence,

$$\|B_T\|_F^2 \leq (1+2pT)\|B_0\|_F^2 + 2qT.$$

Similarly, by choosing  $\varepsilon = \tilde{O}\left(\frac{\sigma_d}{\sqrt{\sigma_1} e_b (m+n)}\right)$ , we have  $qT \leq c^2 d^2 \varepsilon^2$ . By taking  $e_b = 2c$ , we have

$$\|B_T\|_F^2 \leq 3\|B_0\|_F^2 + c^2 d^2 \varepsilon^2 \leq 4c^2 d^2 \varepsilon^2 = e_b^2 d^2 \varepsilon^2,$$

induction succeeds.

## F Proof of Stage Two

Here is the full version of the proof. Initially,  $\|\Delta_0\|_{op} = \|P_{T_0} + Q_{T_0}\|_{op}$  where  $Q = AB^\top - BA^\top$ . Hence  $\|\Delta_0\|_{op} \leq \sigma_1(P_{T_0}) + \sigma_1(Q_{T_0}) \leq \frac{\sigma_d}{4} + \sqrt{2\sigma_1} \sigma_1(B_{T_0}) \leq \frac{\sigma_d}{3}$ . Then for  $U_{T_0}$  we have  $\frac{2\sigma_d}{3} \leq \sigma_d(\Sigma) - \sigma_1(\Delta_0) \leq \sigma_d(U_{T_0} V_{T_0}^\top) \leq \sigma_d(U_{T_0} U_{T_0}^\top) - 2\sigma_1(U_{T_0} B_{T_0}^\top) \leq \sigma_d(U_{T_0} U_{T_0}^\top) - 4\sqrt{2\sigma_1} O\left(\frac{\sigma_d}{\sqrt{\sigma_1}}\right)$ . Hence  $\sigma_d(U_{T_0}) \geq \sqrt{\frac{\sigma_d}{2}}$ . We can do the same thing on  $V_{T_0}$ .

First of all, by equations (8) and (9), we have

$$\|J_{t+T_0}\|_{op} \leq c\varepsilon \left(1 - \frac{\eta \sigma_d}{2}\right)^t \sqrt{\max\{m', d\}},$$

and

$$\|K_{t+T_0}\|_{op} \leq c\varepsilon \left(1 - \frac{\eta \sigma_d}{2}\right)^t \sqrt{\max\{n', d\}}.$$

Expanding  $\Sigma - U_{t+1+T_0} V_{t+1+T_0}^\top$  by brute force<sup>13</sup>, we get

$$\begin{aligned} \Delta_{t+1} &\leq \left(1 - \frac{\eta \sigma_d}{2}\right)^2 \Delta_t + O(\eta^2 \sigma_1^2) \Delta_t + O(\eta \varepsilon^2 \sigma_1 (m+n)) \left(1 - \frac{\eta \sigma_d}{2}\right)^{2t} \\ &\leq \left(1 - \frac{\eta \sigma_d}{2}\right) \Delta_t + O(\eta \varepsilon^2 \sigma_1 (m+n)) \left(1 - \frac{\eta \sigma_d}{2}\right)^{2t}. \end{aligned}$$

Then,

$$\begin{aligned} \frac{\Delta_{t+1}}{\left(1 - \frac{\eta \sigma_d}{2}\right)^{t+1}} &\leq \frac{\Delta_t}{\left(1 - \frac{\eta \sigma_d}{2}\right)^t} + O(\eta \varepsilon^2 \sigma_1 (m+n)) \left(1 - \frac{\eta \sigma_d}{2}\right)^{t-1} \\ &\leq \Delta_0 + O(\varepsilon^2 \kappa (m+n)) \\ &\leq \frac{2}{5} \sigma_d. \end{aligned}$$

Thus we can now verify that  $\Delta_t \leq \left(1 - \frac{\eta \sigma_d}{2}\right)^t \frac{2}{5} \sigma_d$ . Together with the linear convergence of  $J$  and  $K$ , we know the gradient descent converge linearly. Notice that by using the operator norm of  $\Delta_t$ , we can easily prove that  $\sigma_d(U)$  and  $\sigma_d(V)$  in the next iteration is at least  $\sqrt{\frac{\sigma_d}{2}}$  once given  $\|B_{T_0+t}\|_F$  is small.

To give an upper bound on  $\|B\|_F$ , we still use equation (19).

First of all, we have  $\|P\|_F^2 + \|Q\|_F^2 = \|\Sigma - UV^\top\|_F^2$ , since  $P + Q = \Sigma - UV^\top$ , and  $\langle P, Q \rangle = 0$ . Hence,  $\|P_{t+T_0}\|_F \leq \sqrt{d} \Delta_t$  and  $\|Q_{t+T_0}\|_F \leq \sqrt{d} \Delta_t$ .

<sup>12</sup>Here  $\tilde{O}$  means there might be some log terms about  $m, n, \kappa$  and  $e_b$  on the denominator.

<sup>13</sup>Please see (23) for the result of the expanding.

Finally,

$$\begin{aligned} \|B_{t+1+T_0}\|_F^2 &\leq \left(1 + 2\eta \left(1 - \frac{\eta\sigma_d}{2}\right)^t \frac{2}{5}\sigma_d\right) \|B_{t+T_0}\|_F^2 + O(\eta\sigma_d(m+n)d\varepsilon^2) \left(1 - \frac{\eta\sigma_d}{2}\right)^{2t} \\ &\quad + O\left(\eta^2 d\sigma_1\sigma_d^2 \left(1 - \frac{\eta\sigma_d}{2}\right)^{2t}\right). \end{aligned}$$

To solve this iteration formula, we first notice that the product of the main coefficient is bounded by a universal constant,

$$\Xi_T := \prod_{i=0}^{T-1} \left(1 + 2\eta \left(1 - \frac{\eta\sigma_d}{2}\right)^t \frac{2}{5}\sigma_d\right) \leq \exp\left(\sum_{i=0}^{T-1} 2\eta \left(1 - \frac{\eta\sigma_d}{2}\right)^t \frac{2}{5}\sigma_d\right) \leq e^{\frac{8}{5}},$$

we can then write it into an iteration formula about  $\frac{\|B_{t+T_0}\|_F^2}{\Xi_t}$ ,

$$\begin{aligned} \frac{\|B_{t+1+T_0}\|_F^2}{\Xi_{t+1}} &\leq \frac{\|B_{t+T_0}\|_F^2}{\Xi_t} + O(\eta\sigma_d(m+n)d\varepsilon^2) \left(1 - \frac{\eta\sigma_d}{2}\right)^{2t} \\ &\quad + O\left(\eta^2 d\sigma_1\sigma_d^2 \left(1 - \frac{\eta\sigma_d}{2}\right)^{2t}\right) \\ &\leq \|B_{T_0}\|_F^2 + O((m+n)d\varepsilon^2) + O(\eta d\sigma_1\sigma_d). \end{aligned}$$

By taking  $\varepsilon = O\left(\frac{\sigma_d}{\sqrt{\sigma_1(m+n)d}}\right)$  and  $\eta = O\left(\frac{\sigma_d}{d\sigma_1^2}\right)$ , induction on  $\|B\|_F$  holds.

## G Matrix sensing problem

We only consider full-rank case here, i.e.  $\Sigma$  is a  $d \times d$  full-rank matrix, and we would like to factorize  $\Sigma$  into  $U \times V^\top$ , where  $U, V \in \mathbb{R}^{d \times d}$ .

For a sufficiently large integer  $N$ , consider measurements  $M_1, M_2, \dots, M_N \in \mathbb{R}^{d \times d}$  generated by i.i.d. Gaussian distribution. Define labels  $y_i := \langle M_i, \Sigma \rangle$  for  $i \in [N]$ .

The objective function is defined as

$$f(U, V) = \frac{1}{2N} \sum_{i \in [N]} (\langle M_i, UV^\top \rangle - y_i)^2,$$

which can be equivalently written as  $\frac{1}{2N} \sum_{i \in [N]} \langle M_i, UV^\top - \Sigma \rangle^2$ .

And the gradient descent with learning rate  $\eta$  can be written as

$$\begin{aligned} U_{t+1} &= U_t - \frac{\eta}{N} \sum_{i \in [N]} \langle M_i, UV^\top - \Sigma \rangle M_i V; \\ V_{t+1} &= V_t - \frac{\eta}{N} \sum_{i \in [N]} \langle M_i, UV^\top - \Sigma \rangle M_i^\top U. \end{aligned}$$

### G.1 Symmetrization

Suppose the SVD of  $\Sigma$  is  $\Phi \Sigma' \Psi^\top$ . Then if we replace the objective matrix by  $\Sigma'$ , replace the measurements by  $\Phi^\top M_i \Psi$  and replace the initial parameter matrices by  $\Phi^\top U$  and  $\Psi^\top V$ , then everything, including the objective function, the gradient descent process, the loss value, etc. are the same. Hence, we can assume, without loss of generality,  $\Sigma$  is a positive semi-definite matrix. (We could also check that the initialization and measurements are still i.i.d. Gaussian generated.)

To simplify the notation, we define a linear operator  $\Lambda : \mathbb{R}^{d \times d} \rightarrow \mathbb{R}^{d \times d}$ ,  $\Lambda(X) := \frac{1}{N} \sum_{i \in [N]} \langle M_i, X \rangle M_i$ . A standard concentration analysis shows that when there are sufficiently large number of measurements, then with large probability,  $\Lambda$  is sufficiently close to an identity operator,

with respect to operator norm. Define the error term  $E : \mathbb{R}^{d \times d} \rightarrow \mathbb{R}^{d \times d}$ ,  $E(X) = \Lambda(X) - X$ . The error term  $E$  can be described by RIP.

Hence, the gradient process can now be written as

$$\begin{aligned} U_{t+1} &= U_t - \eta(U_t V_t^\top - \Sigma) V_t - \eta E(U_t V_t^\top - \Sigma) V_t; \\ V_{t+1} &= V_t - \eta(U_t V_t^\top - \Sigma)^\top U_t - \eta E(U_t V_t^\top - \Sigma)^\top U_t. \end{aligned}$$

Hence, we can define  $A_t = \frac{U_t + V_t}{2}$  and  $B_t = \frac{U_t - V_t}{2}$ . Then the iteration formula becomes

$$\begin{aligned} A_{t+1} &= A_t + \eta(\Sigma - A_t A_t^\top + B_t B_t^\top - E_t^+) A_t - \eta(A_t B_t^\top - B_t A_t^\top - E_t^-) B_t; \\ B_{t+1} &= B_t - \eta(\Sigma - A_t A_t^\top + B_t B_t^\top + E_t^-) B_t + \eta(A_t B_t^\top - B_t A_t^\top + E_t^+) A_t, \end{aligned}$$

where  $E_t^+ = \frac{E(U_t V_t^\top - \Sigma) + E(U_t V_t^\top - \Sigma)^\top}{2}$  and  $E_t^- = \frac{E(U_t V_t^\top - \Sigma) - E(U_t V_t^\top - \Sigma)^\top}{2}$  are small matrices.

By lemma 3.2 we know that if  $B$  and  $E^{+/-}$  is small, the minimal singular value of  $A$  is monotonically increasing. And similarly, we could define  $P$  and hopefully we could also use lemma 3.3 to prove that the minimal eigenvalue of  $P$  is not very small and hence the F-norm of  $B$  won't be too large.

**Remark G.2.** *As for deep matrix factorization problem, there could be some similar techniques to handle it. For instance, if we would like to factorize  $\Sigma$  into  $2m$  matrices  $\prod_{i \in [2m]} U_i$ , one naive idea is*

*to first symmetrize  $\Sigma$  and then define  $A_i = \frac{U_i + U_{2m-i}}{2}$  and  $B_i = \frac{U_i - U_{2m-i}}{2}$  for  $i \in [m]$ . If we can find any monotonic value in these matrices (possibly the minimal singular values of  $A_i$ ), it would guide us to the global convergence.*
